# Supplementary material for: Dynamic haematopoietic cell contribution to the developing and adult epicardium
Source: PubMed Central journal article supplement — Nat Commun. 2014 Jun 6;5:4054. doi: 10.1038/ncomms5054 (PMC4059938; doi:10.1038/ncomms5054), 2014-06-06
Supplement: ncomms5054-s1.pdf [file ncomms5054-s1.pdf]

Balmer et al\_Supp. Fig. 1

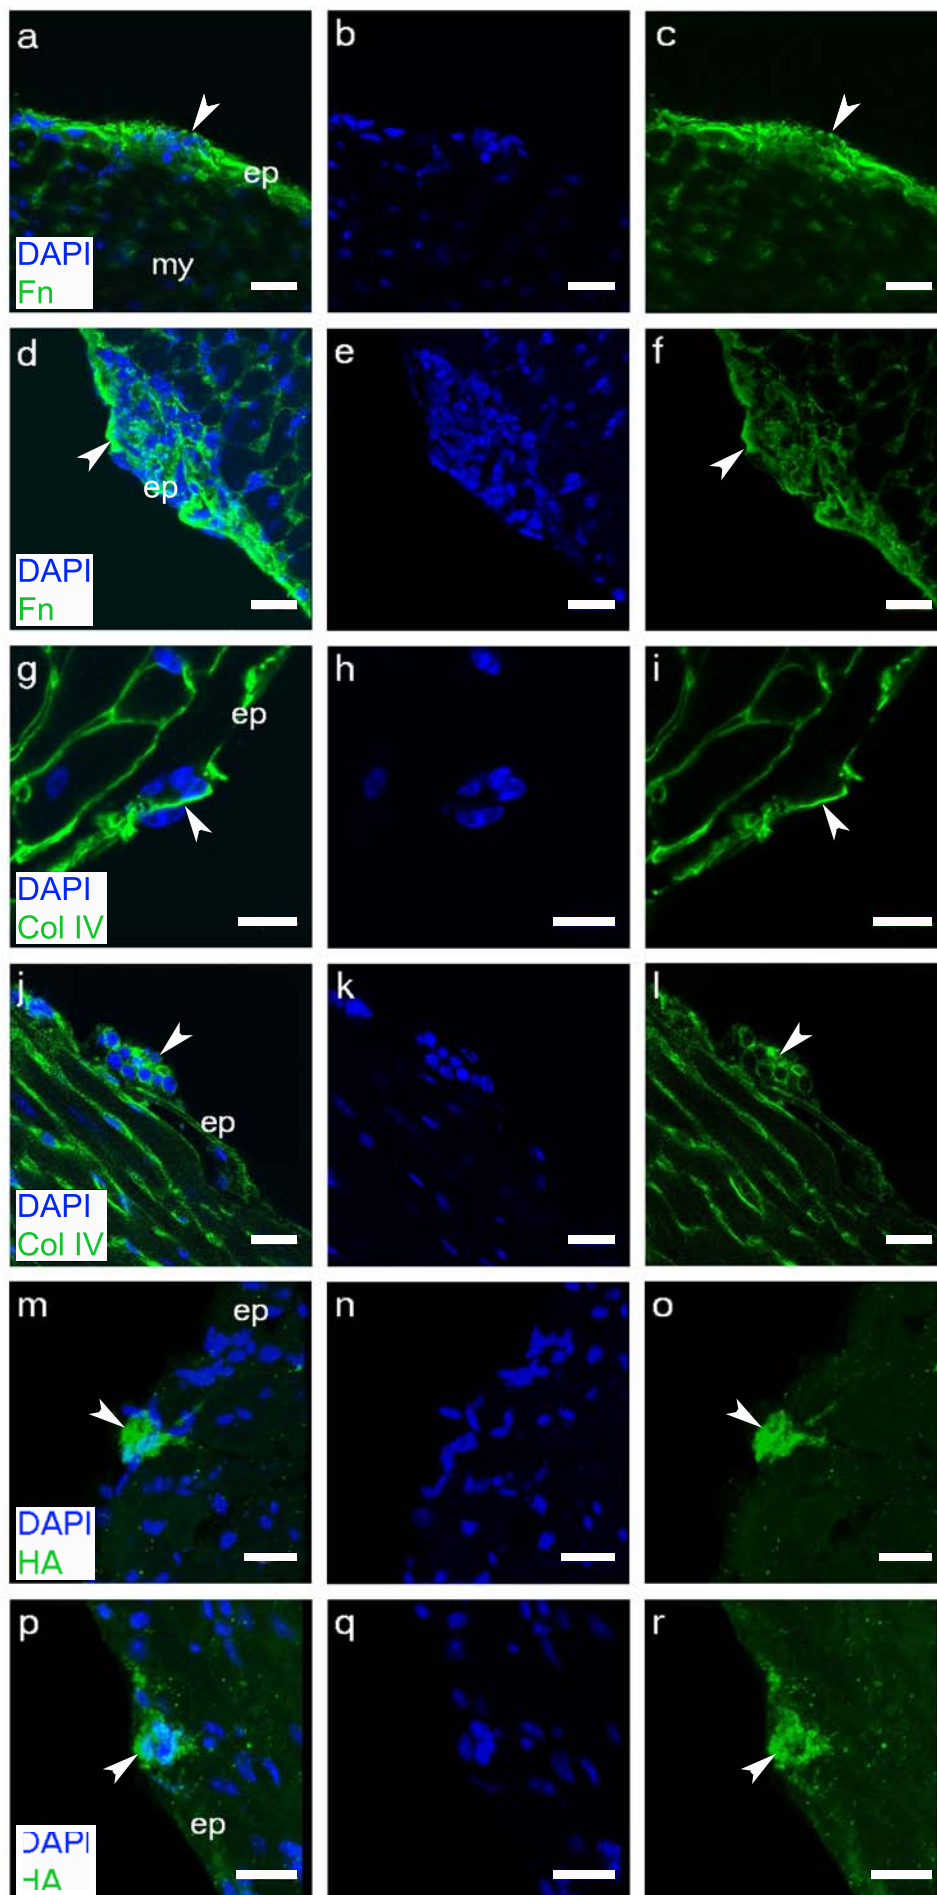

**Supplementary Figure 1. Characterisation of extracellular matrix protein expression in adult epicardial cell clusters.**

Immunofluorescent staining for ECM markers in adult epicardium highlighted the presence of cell clusters surrounded by matrix as demarcated by antibodies against Fibronectin (Fn; **a-f**), Collagen IV (Col IV; **g-l**) and Hyaluronic acid (HA; **m-r**). White arrowheads highlight the containment of cells within clusters in the epicardium of adult, wild type mouse hearts; ep, epicardium. Scale bars 20 $\mu$ m (**a-f, j-l**); 10 $\mu$ m; (**g-i**).

Balmer et al\_Supplementary Fig. 2

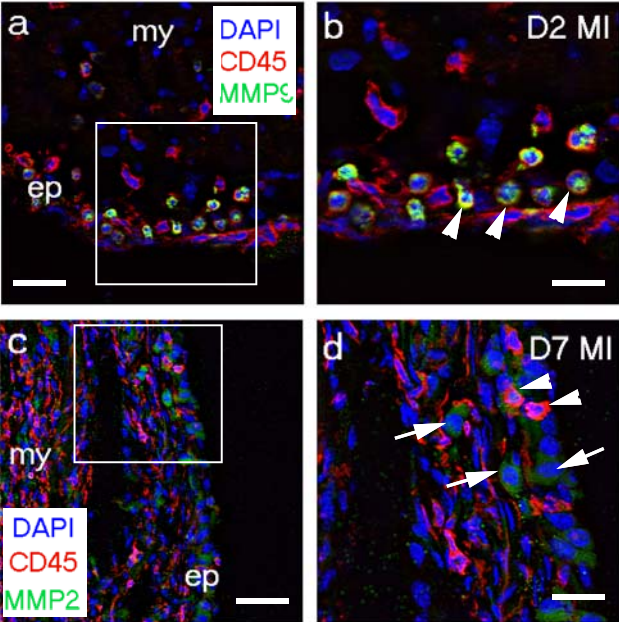

**Supplementary Figure 2. Localisation of MMP2 and MMP9 to regions of CD45-cell cluster associated ECM breakdown post-MI.**

Immunofluorescent staining for matrix metalloproteinase (MMP) markers, revealed MMP9 co-localised to CD45+ cells (**a**; white arrowheads in **b**) within the epicardium 2 days post-MI and cells that stained for both CD45+ and MMP2 at 7 days post-MI (**c**; white arrowheads in **d**) alongside neighbouring cells that were CD45- and MMP2+ at 7 days post-MI (white arrows in **d**) suggesting MMP-activity may contribute to the breakdown of ECM associated with the dispersal of CD45+ cell clusters (Figure 1, 3 and Supp. Figure 1) following injury. White box inserts in **a** and **c** depicted at higher magnification in **b** and **d** respectively; ep, epicardium; my, myocardium. Scale bars 50µm (**a, c**); 10mm (**b, d**).

Balmer et al\_Supplementary Fig. 3

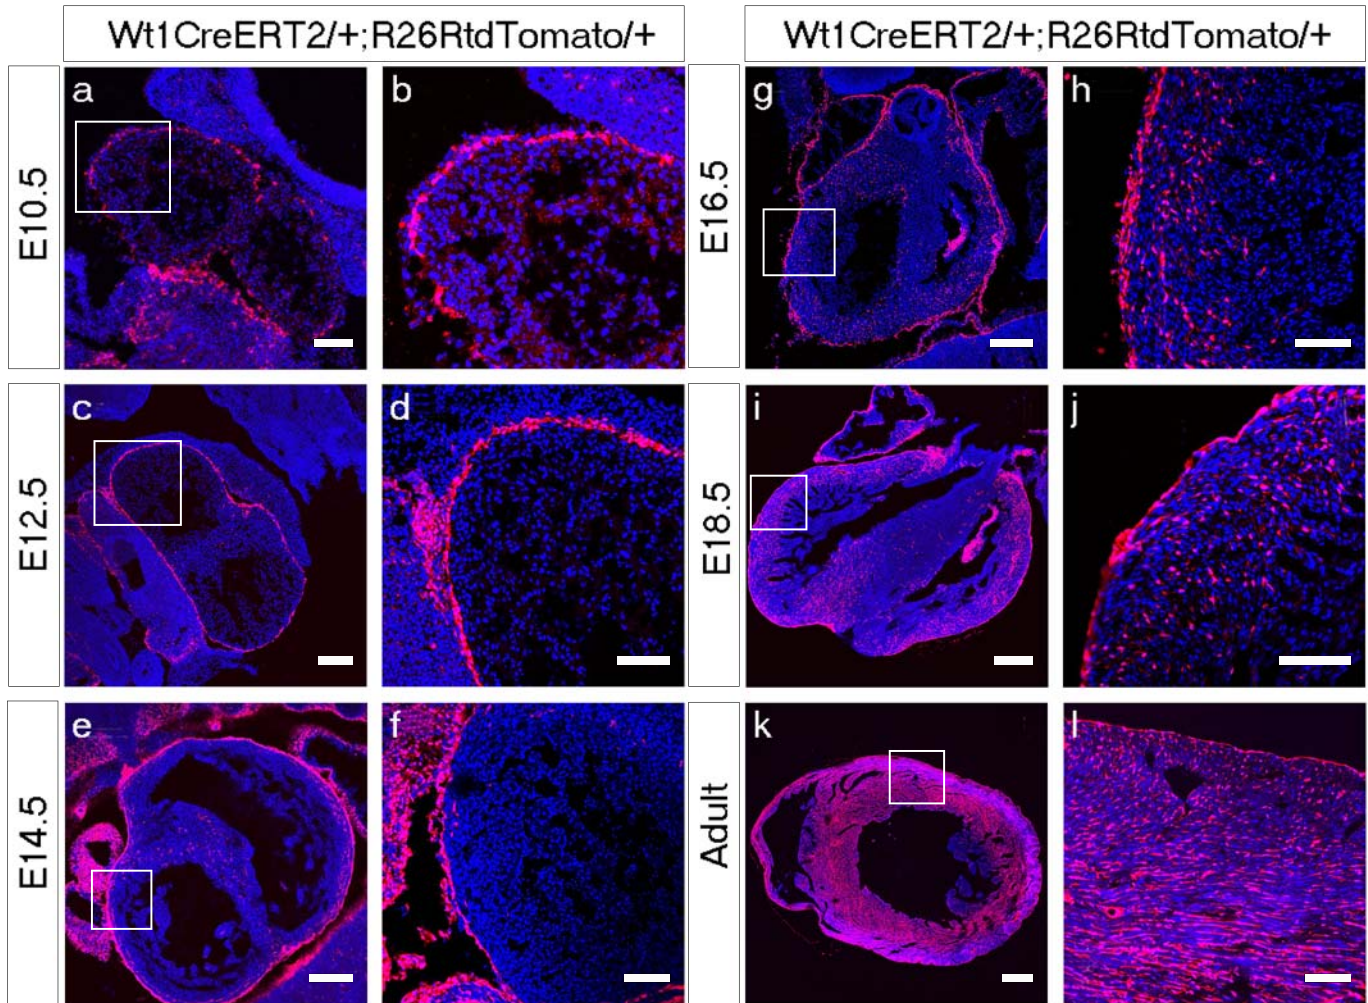

**Supplementary Figure 3. Wt1CreERT2;R26R-tdTomato efficiently labels the epicardium and epicardial cell derivatives throughout development.**

Wt1CreERT2/+; R26R-tdTomato dams were injected with tamoxifen and progesterone at E9 and again at E11, embryos were analysed for tdTomato<sup>+</sup> expression at E10.5 (**a, b**), E12.5 (**c, d**), E14.5 (**e, f**), E16.5 (**g, h**), E18.5 (**i, j**) and adult stages (**k, l**). The efficient labelling of the epicardium at all stages of development into adulthood excluded the possibility of suboptimal recombination, due to failed tamoxifen induction, accounting for the lack of Wt1<sup>+</sup>/tomato<sup>+</sup> cells observed in the expanded epicardium post-injury (see Fig. 3e-h). Scale bars: 100µm (**a, f, h, j, l**); 50µm (**b**); 200µm (**c, e**); 90µm (**d**); 300µm (**g, i**); 600µm (**k**).



Balmer et al\_Supplementary Fig. 4

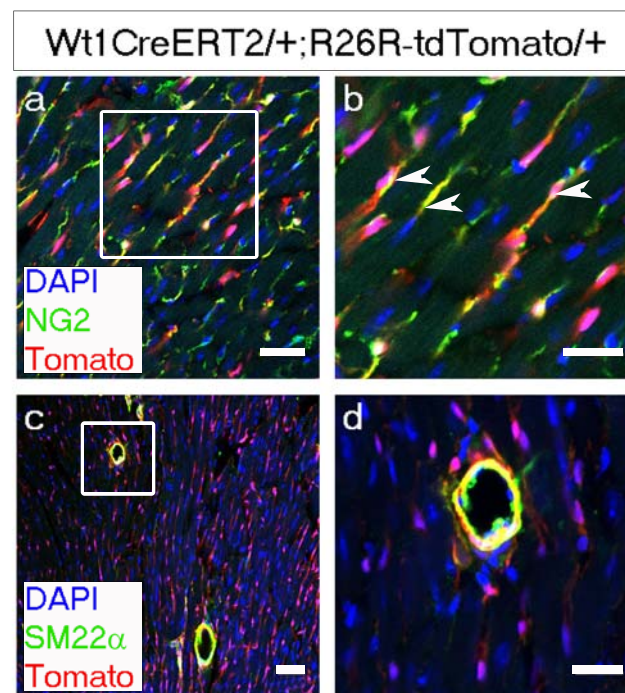

**Supplementary Figure 4. Wt1<sup>+</sup> cells can give rise to pericytes and vascular smooth muscle cells in the adult heart.** Wt1CreERT2<sup>+/+</sup>; R26R-tdTomato dams were injected with tamoxifen and progesterone successively at E9 and E11, pups were delivered at E18.5 and fostered. IMF revealed tomato<sup>+</sup> cells (arising from the Wt1<sup>+</sup> lineage) that were also positive for the pericyte marker NG2 (**a, b**) and the vascular smooth muscle cell marker SM22 $\alpha$ , where tomato<sup>+</sup>/Sm22 $\alpha$ <sup>+</sup> cells were seen lining the wall of a coronary vessel (**c, d**); white inset boxes in **a** and **c** are shown at higher magnification in **b** and **d** respectively. Scale bars: 30 $\mu$ m (**a**); 20  $\mu$ m (**b, d**); 50  $\mu$ m (**c**).



Balmer et al\_Supplementary Fig. 5

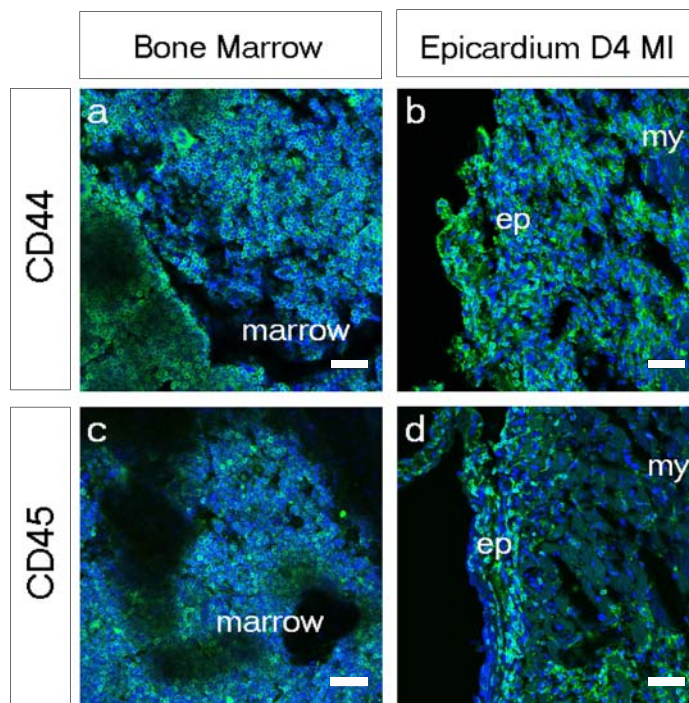

**Supplementary Figure 5. CD44<sup>+</sup> and CD45<sup>+</sup> bone marrow cells reside in the expanded region of the epicardium post-MI.**

Immunofluorescent staining detected CD44<sup>+</sup> and CD45<sup>+</sup> cells in adult bone marrow (**a, b**).

Equivalent CD44<sup>+</sup> and CD45<sup>+</sup> sub-populations were located in the adult epicardium 4 days post-MI (**c, d**). ep, epicardium. Scale bars: 50 $\mu$ m (**a-d**).

Balmer et al\_Supplementary Fig. 6

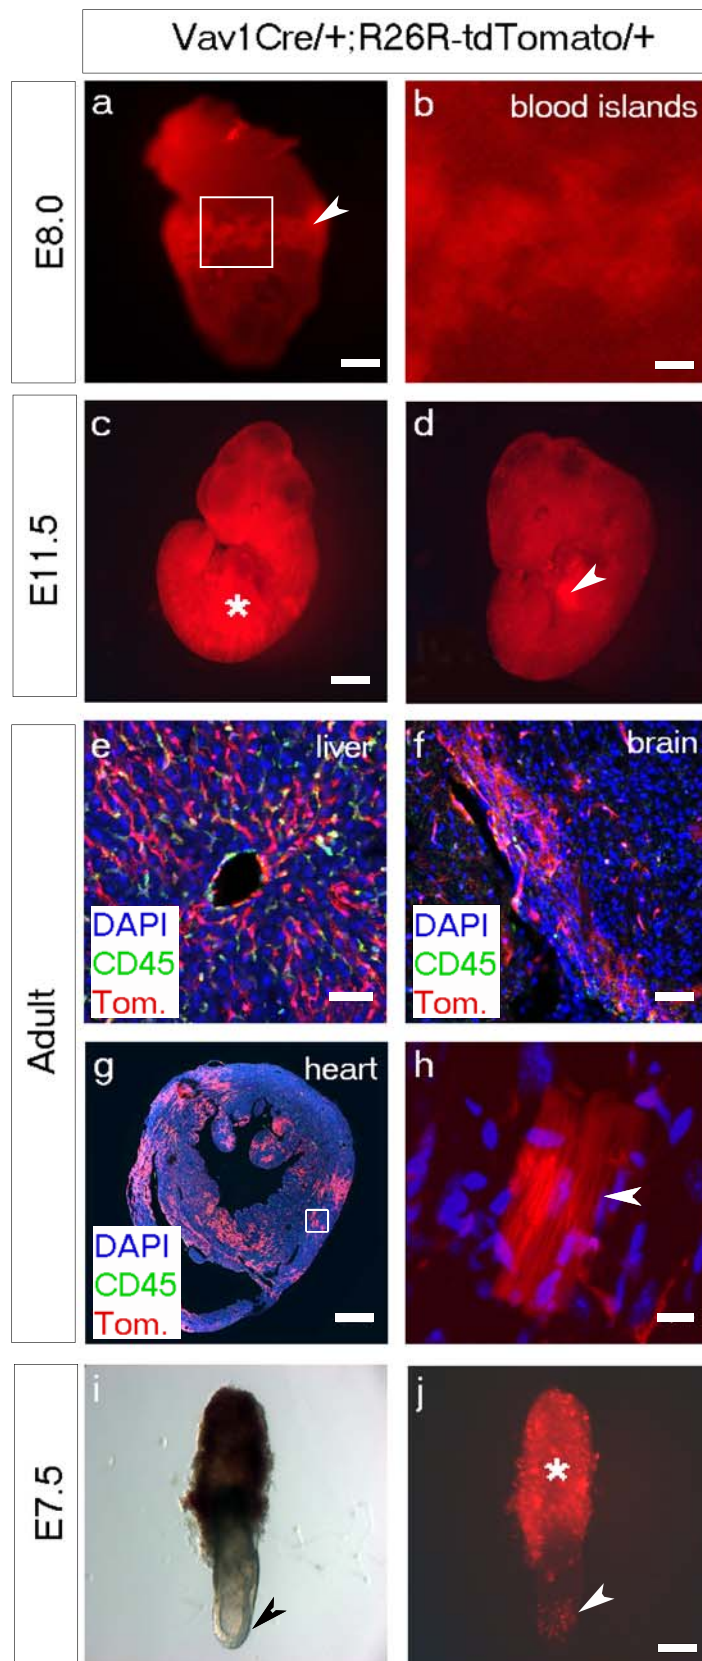

**Supplementary Figure 6. Vav1-Cre;R26R-tdTomato lineage traces haemagenic endothelium of the yolk sac blood islands, AGM and liver in addition to derivatives in heart and brain.**

Vav1-Cre;R26R-tdTomato embryos were dissected at E7.5, E8.0 and E11.5 and the expression of tdTomato assessed by direct fluorescence. At E8.0 tdTomato<sup>+</sup> cells were observed in the trophoblast (**a**; white asterice) and in presumptive blood islands (**b**; white arrowheads). At E11.5, embryos with the expected staining in haematopoietic regions were observed, including the aorta-gonad-mesonephros (AGM) region (**c**), foetal liver (**d**) and adult liver (**e**; 3 out of 6 embryos analysed). However, other embryos showed a variable degree of colonisation of tdTomato<sup>+</sup> cells throughout the developing embryo including the brain (**f**) and adult heart (**g**), containing tdTomato<sup>+</sup> cardiomyocytes (**h**). This suggested that non-specific Cre recombination could occur in the Vav1-Cre mouse line and indeed, sporadic tdTomato<sup>+</sup> cells were detected in the epiblast at E7.5 (black arrowhead in **i**, and white arrowhead in **j**; white asterice in **j** highlights maternal tdTomato<sup>+</sup> cell contribution to the ectoplacental cone). For the analyses described, only those embryos with none or less than 5% non-specific colonisation were selected. Scale bars: 30  $\mu\text{m}$  (**a**, **b**, **i**, **j**); 50  $\mu\text{m}$  (**c**, **d**); 800 $\mu\text{m}$  (**g**); 10  $\mu\text{m}$  (**h**).

Balmer et al\_Supplementary Fig. 7

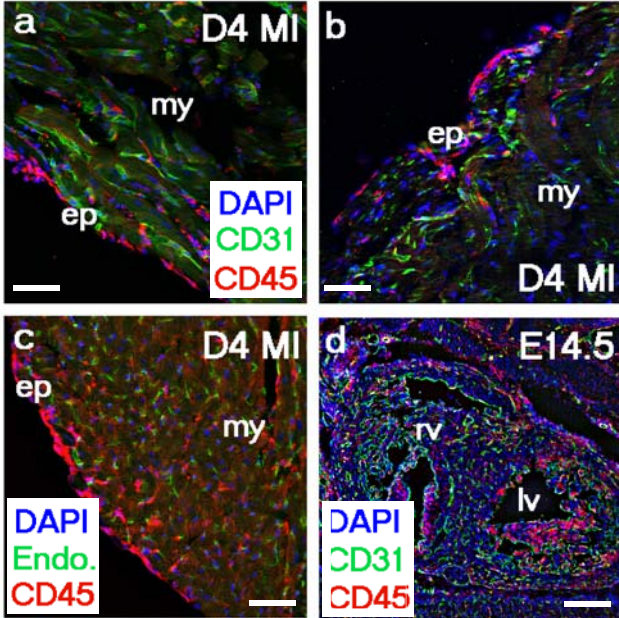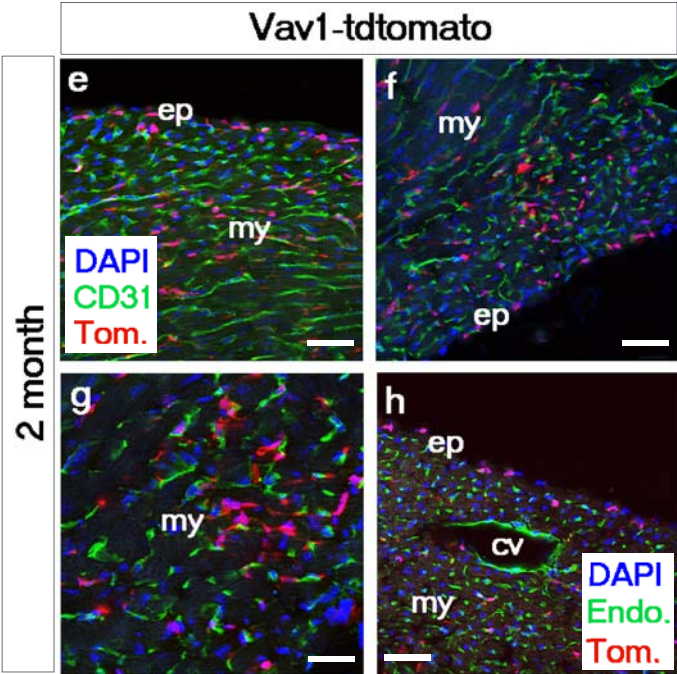

**Supplementary Figure 7. CD45+/Vav1-tdTomato+ cells are negative for endothelial markers during development and following BM transplantation or injury.**

Immunostaining for CD31 (**a, b**) and endomucin (**c**) at 4 days post-MI revealed CD45+ cells did not have an endothelial cell phenotype. CD31 co-staining also revealed CD45+ cells within the heart during development at E14.5 were not endothelial cells (**d**). Transplantation of Vav1-tdTomato cells into irradiated hosts were examined at 2 months for either CD31 (**e-g**) or endomucin staining (**h**) to reveal that donor Vav1-tdTomato+ cells did not adopt an endothelial cell fate. cv, coronary vessel; ep, epicardium; my, myocardium. Scale bars. 50  $\mu\text{m}$  (**a, c, e, f, h**) 30  $\mu\text{m}$  (**b, g**); 200 $\mu\text{m}$  (**d**).

Balmer et al\_Supplementary Fig. 8

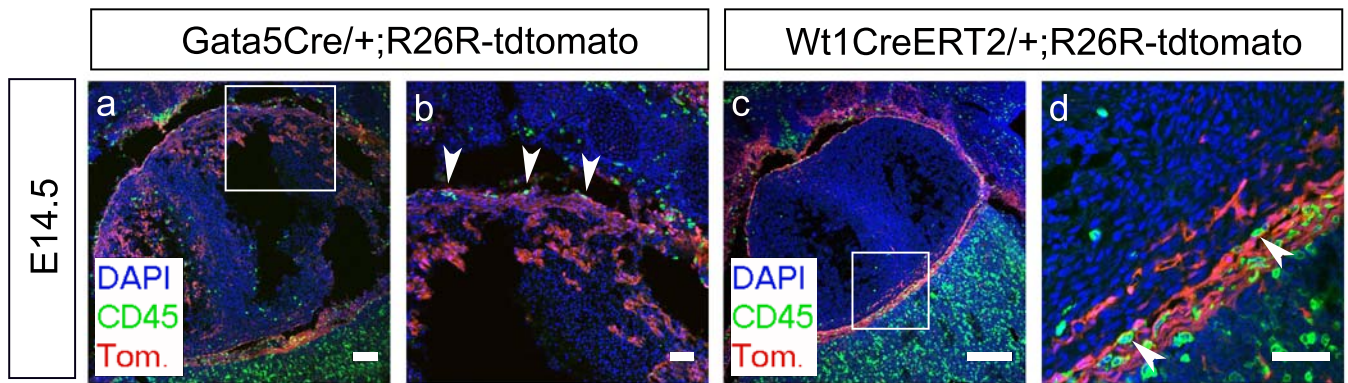



**Supplementary Figure 8. Gata5 and Wt1 lineages do not give rise to CD44+ or CD45+ cells during development.**

Gata5Cre/+;R26RtdTomato (**a, b**) and Wt1CreERT2/+;R26RtdTomato (**c, d**) lineage traces were used to determine the origin of cells residing in the epicardial clusters. Immunofluorescent staining at E14.5 revealed CD45+ cells (highlighted by white arrowheads) were not tomato+ and, therefore, did not arise from Gata5+ or Wt1+ lineages. Scale bars: 100µm (**a**); 50 µm (**b, d**); 200 µm, (**c**).

Balmer et al\_Supplementary. Fig. 9

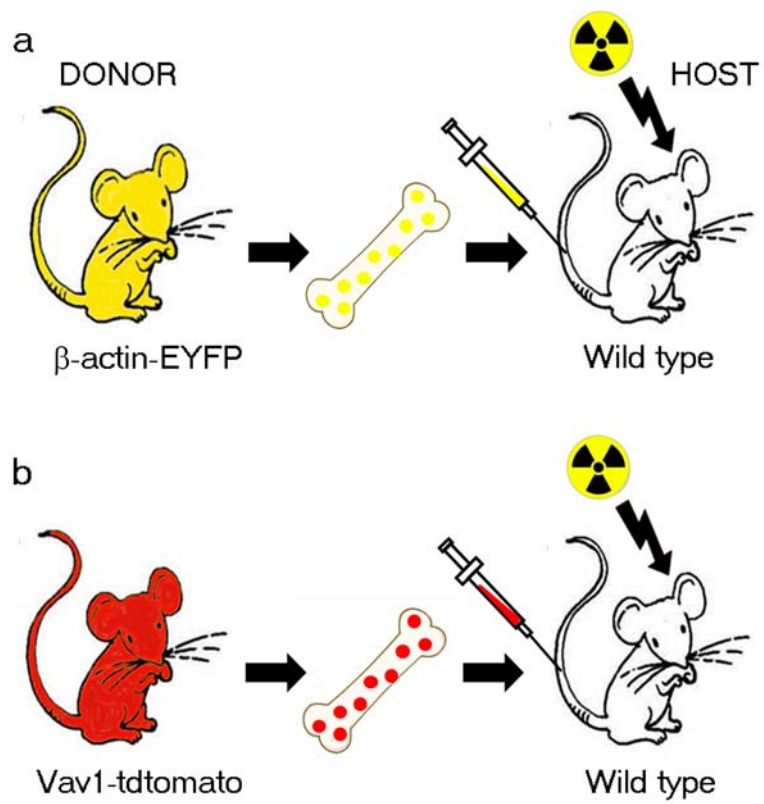

**Supplementary Figure 9. Overview of transplantation experiments with whole bone marrow and Vav1-tdTomato haematopoietic stem cells.**

Whole bone marrow cells were isolated from the femurs of  $\beta$ -actinCre;R26R-EYFP mice (**a**), or lin-negative cells were sorted from femur-extracted bone marrow from Vav1-Cre;R26RtdTomato mice (**b**) and injected into the tail vein of unlabelled wild type host mice that had been sub-lethally (6Gy) or lethally irradiated (successive 4Gy plus 5 Gy). Reconstitution of the host bone marrow was predicted to occur between 7 and 14 days according to previous studies<sup>46</sup>. Hearts were analysed at 2 and 6 months post transplantation.

Balmer et al\_Supplementary Fig. 10

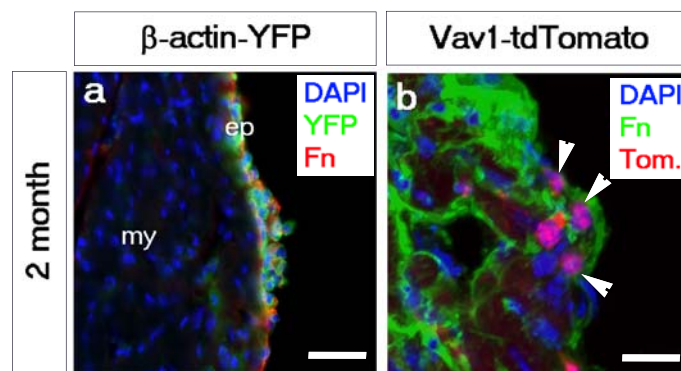

**Supplementary Figure 10. Transplanted whole bone marrow and Vav1-tdTomato haematopoietic stem cells traffic into adult epicardial clusters.**

2 months after transplantation (Supplementary Fig. 9) both YFP<sup>+</sup> whole BM cells and Vav1-tdTomato HCs were observed in host adult epicardial cell clusters (**a**, **b**; arrowheads in **b** highlight individual tdTomato<sup>+</sup> cells encapsulated by fibronectin (Fn)<sup>+</sup> ECM). ep, epicardium; my, myocardium. Scale bars: 100µm (**a**); 30 µm (**b**).

Balmer et al\_Supplementary Fig. 11

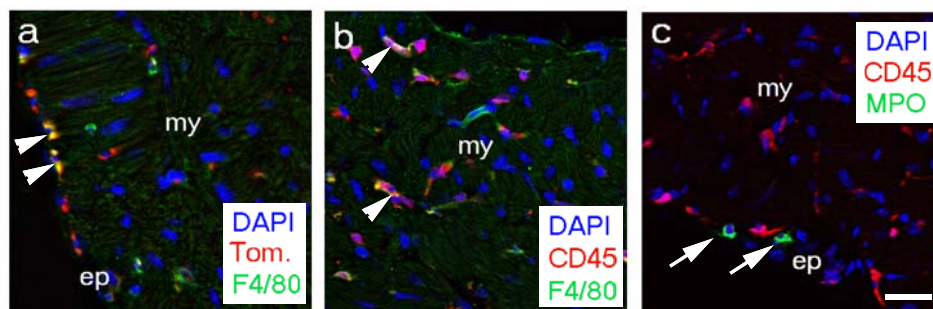

**Supplementary Figure 11. A minor sub-population of transplanted CD45+/Vav1-tdTomato+ cells were positive for the macrophage marker F4/80, but none were positive for the neutrophil marker MPO.**

Immunostaining for F4/80 revealed some (less than 10%) of the transplanted Vav1-tdTomato (a) or CD45+ cells (b) were indicative of activated macrophages; consistent with the majority of transplanted cells staining negative for the myeloid lineage marker Ly6c (Figure 6t). MPO immunostaining revealed that none of the donor cells were neutrophils (c); ep, epicardium; my, myocardium. Scale bar 50µm (a-c)



Balmer et al\_Supplementary Fig. 12

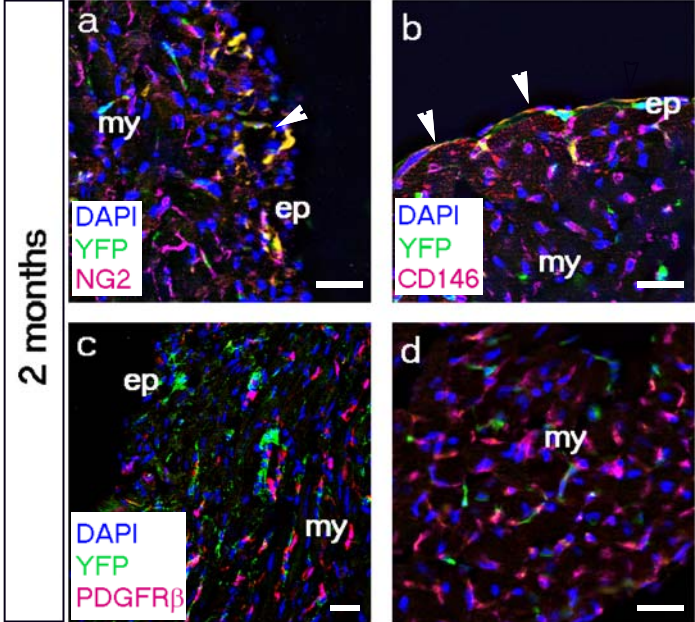

**Supplementary Figure 12. Donor BM (YFP+) cells arising from within the adult epicardium differentiated, in part, into NG2+/CD146+ pericytes but not PDGFR $\beta$ + fibroblasts.**

Immunostaining for NG2 (**a**) and CD146 (**b**; positive cells highlighted by white arrowheads) confirmed that a proportion of donor BM (YFP+) cells differentiated into pericytes (NG2+ cells adjacent to a coronary vessel highlighted by white arrowhead in **a**). Immunostaining for PDGFR $\beta$  excluded a contribution to the mesenchymal/fibroblast lineage in either epicardium (**c**) or the underlying myocardium (**d**). ep.epicardium; my, myocardium. Scale bars 50  $\mu$ m (**a-d**).
